# Supplementary material
Source: publisher figshare collection journal article supplement (https://acs.figshare.com/ndownloader/files/3878839)
Supplement: Supplementary file 1 [file 3878839]

# **Multichannel Series Piezoelectric Quartz Crystal Cell Sensor for Real Time and Quantitative Monitoring of the Living Cell and Assessment of Cytotoxicity**

Feifei **Tong**, Yan **Lian**, Huang **Zhou**, Xiaohong **Shi**, Fengjiao He\*

State Key Laboratory of Chemo/Biosensing and Chemometrics, College of Chemistry  
and Chemical Engineering, Hunan University, Changsha, Hunan 410082, China  
Tel.: +86 731 88272269. Fax: +86 731 88055818.

E-mail: fengjiao87799232@hotmail.com.

## **ABSTRACT:**

A new multichannel series piezoelectric quartz crystal (MSPQC) cell sensor for real time monitoring of living cells *in vitro* was reported in this paper. The constructed sensor was used successfully to monitor adhesion, spreading, proliferation, and apoptosis of MG63 osteosarcoma cells and investigate the effects of different concentrations of cobalt chloride on MG63 cells. Quantitative real time and dynamic cell analyses data were conducted using the MSPQC cell sensor. Compared with methods such as fluorescence- staining and morphology observation by microscopy, the MSPQC cell sensor is a non-invasive, label- free, simple, cheap, and capable of online monitoring. It can automatically record the growth status of cells and quantitatively evaluate cell proliferation and the apoptotic response to drugs. It will be a valuable detection and analysis tool for the acquisition of cellular level information and is anticipated to have application in the field of cell biology research or cytotoxicity testing in the future.

## SUPPORTING INFORMATION AVAILABLE

Table 1. The comparison between the frequency shifts of calculated by theoretical model and obtained by sensor.

| Time | $\Delta R_{cell}$<br>( $\Omega$ ) | $\Delta C_{cell}$<br>( $\times 10^{-12}F$ ) | $\Delta F_{theory}$<br>(Hz) | $\Delta F_{sensor}$<br>(Hz) | error |
|------|-----------------------------------|---------------------------------------------|-----------------------------|-----------------------------|-------|
| 0h   | 0                                 | 0                                           | 0                           | 0                           | 0     |
| 16h  | 83.3                              | 0.51                                        | 151.48                      | 158                         | -4.8% |
| 32h  | 138.1                             | 2.27                                        | 183.62                      | 192                         | -3.2% |
| 48h  | 206.4                             | 6.05                                        | 298.33                      | 284                         | +3.7% |
| 64h  | 211.3                             | 6.58                                        | 419.96                      | 432                         | -2.6% |
| 80h  | 197.7                             | 6.22                                        | 396.47                      | 412                         | -1.2% |

To verify the validity of the theoretical model, we measured and calculated the cell adhesion resistance and capacitance at different time points using the impedance analyzer. These parameters were substituted into the derived equations to calculate the theoretical value of frequency shift ( $\Delta F_{theory}$ ), which was then compared with the frequency shift obtained from the sensor ( $\Delta F_{sensor}$ ). The results showed that the theoretical and experimental values were consistent with each other within the range of error. Please refer to Table 1.  $\Delta C_{cell}$  and  $\Delta R_{cell}$  were the changes of the cell adhesion capacitance and resistance, respectively.

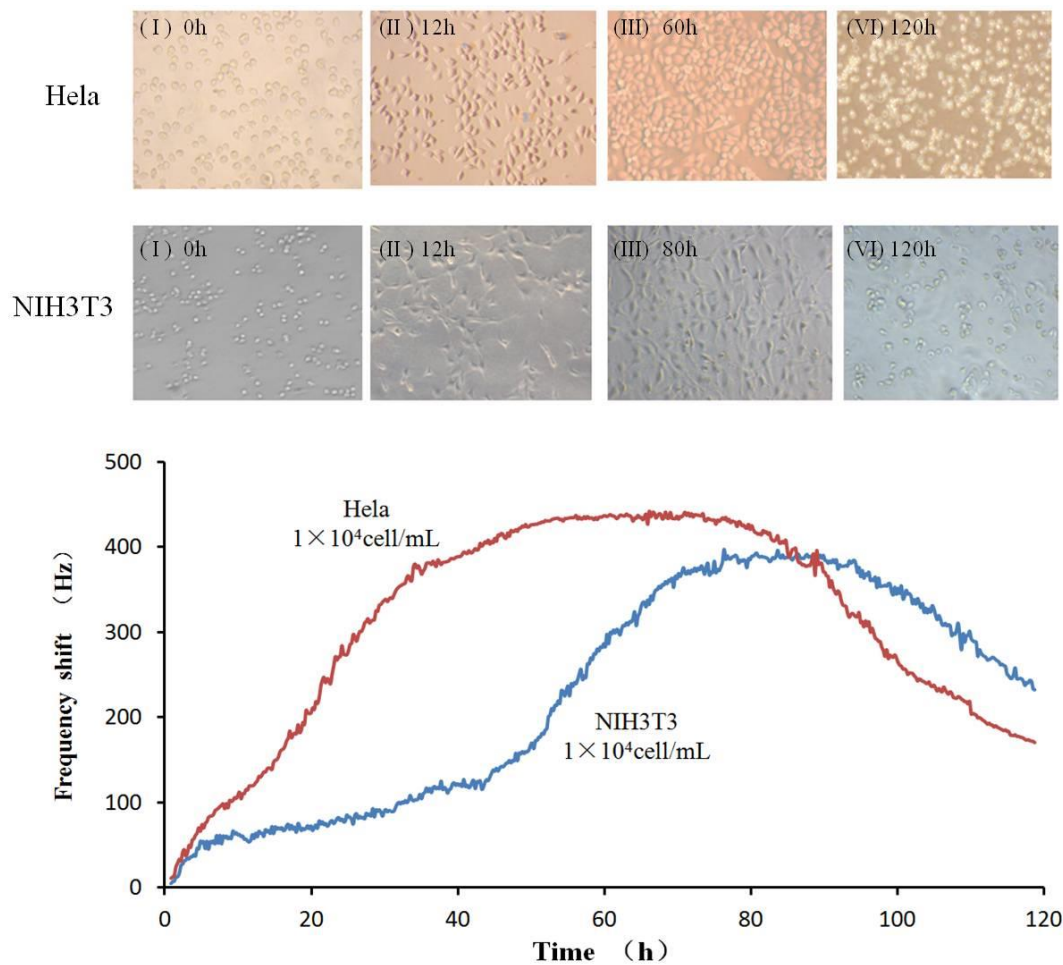

**Figure 1\*.** The frequency shift response and photomicrograph of HeLa and NIH3T3 cells inoculated on the ITO electrode at different time points.

The frequency shift response of HeLa cells increased rapidly after seeding, and soon reached the plateau, which was consistent with the oblate shape of HeLa cell and the early arrival of proliferation phase observed by the microscope. The frequency shift response of NIH3T3 cells increased slowly after seeding, consistent with that NIH3T3 cells appeared slender shape and relatively longer spreading phase. After 48h, NIH3T3 cells began to proliferate, so the frequency shift rising significantly. In the decrease phase of the frequency shift, apoptosis took place in both kinds of cells, as

showed in Figure 1\*. The results confirmed the sensor's performance.
